# Supplementary material for: Comprehensive analysis of β-catenin target genes in colorectal carcinoma cell lines with deregulated Wnt/β-catenin signaling
Source: Springer Nature journal article supplement (doi:10.1186/1471-2164-15-74), 2014-01-01

**A**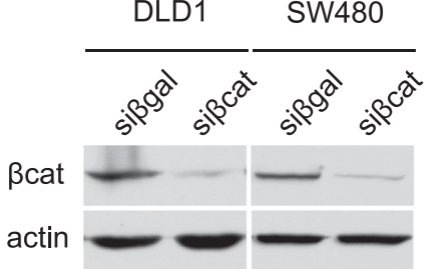**B**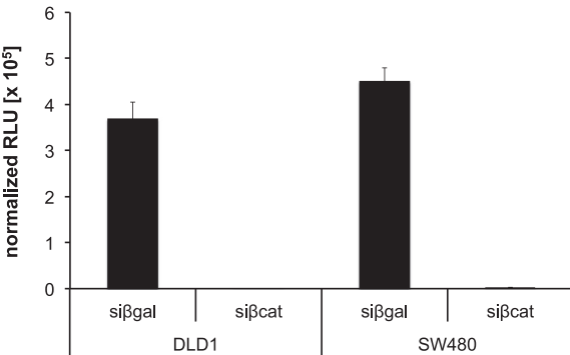

Supplement: 12864_2013_5709_MOESM6_ESM.pdf [file 12864_2013_5709_MOESM6_ESM.pdf]
